# Supplementary material for: Accelerated crystallization of mesoporous Al2O3 powder recovered by spray-drying with a large amount of heated air
Source: Royal Society of Chemistry journal article supplement (doi:10.1039/d1nj01488a), 2021-01-01
Supplement: d1nj01488a1.pdf [file d1nj01488a1.pdf]

Electronic Supplementary Information (ESI):

### Accelerated crystallization of mesoporous $\text{Al}_2\text{O}_3$ powder recovered by spray-drying with a large amount of heated air

Ryutaro Wakabayashi\*

Innovative Functional Materials Research Institute, National Institute of Advanced Industrial  
Science and Technology (AIST), Shimoshidami, Moriyama-ku, Nagoya 463-8560, Japan.

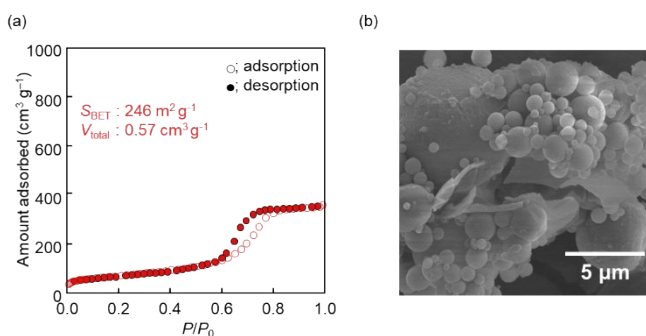

**Fig. S1** (a)  $\text{N}_2$  adsorption-desorption isotherm and (b) representative SEM image of mesoporous  $\text{Al}_2\text{O}_3$  (prepared with Pluronic P123 15 g, calcined at  $850 \text{ }^\circ\text{C}$ ) that can be recovered by spray drying with a large ( $0.8 \text{ m}^3 \text{ min}^{-1}$ ) amount of heated air.

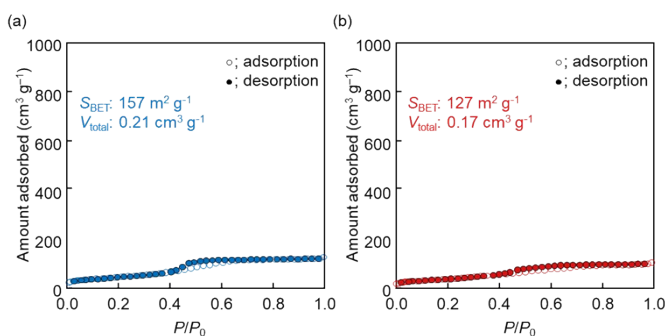

**Fig. S2**  $\text{N}_2$  adsorption-desorption isotherms of mesoporous  $\text{Al}_2\text{O}_3$  (prepared with Pluronic F68 10 g, calcined at  $850 \text{ }^\circ\text{C}$ ) that can be recovered by spray drying with (a) a small ( $0.2 \text{ m}^3 \text{ min}^{-1}$ , blue line) and (b) a large ( $0.8 \text{ m}^3 \text{ min}^{-1}$ , red line) amount of heated air.

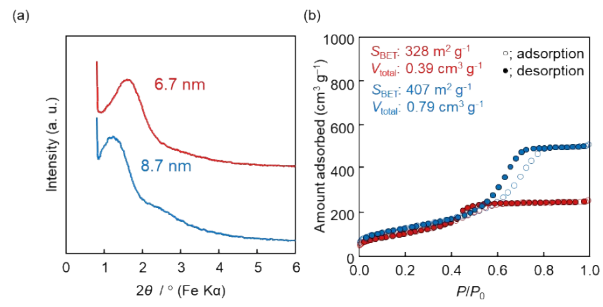

**Fig. S3** (a) Low-angle XRD patterns and (b)  $N_2$  adsorption-desorption isotherms of mesoporous  $Al_2O_3$  (prepared with Pluronic F68 10 g, calcined at 400  $^\circ C$ ) that can be recovered by spray drying with a small ( $0.2 m^3 min^{-1}$ , blue line) and a large ( $0.8 m^3 min^{-1}$ , red line) amount of heated air.
